# Supplementary material for: Synergistic arsenic(v) and lead(ii) retention on synthetic jarosite. I. Simultaneous structural incorporation behaviour and mechanism
Source: Royal Society of Chemistry journal article supplement (doi:10.1039/c7em00426e), 2017-11-27
Supplement: c7em00426e1.pdf [file c7em00426e1.pdf]

1                   **Electronic supplementary information**

2

3                   **Synergistic Arsenic (V) and Lead (II) retention on synthetic jarosite.**

4                   **I. Simultaneous structural incorporation behaviour and mechanism**

5

6                   J. Aguilar-Carrillo<sup>1\*</sup>, M. Villalobos<sup>2</sup>, T. Pi-Puig<sup>2</sup>, I.N. Escobar-Quiroz<sup>2</sup>, and F.M. Romero<sup>2</sup>

7

8                   <sup>1</sup> Cátedra CONACyT – Department of Environmental Technology, Institute of Metallurgy, UASLP, 78210, San  
9 Luis Potosí, Mexico

10                  <sup>2</sup> Department of Geochemistry, Institute of Geology, UNAM, 04510, CDMX, Mexico

11

12

13                  \* Author to whom correspondence should be addressed.

14                  Phone: +52 444 8261450

15                  email: jaguilarca@conacyt.mx

16

17

18                  **This document contains:**

19                  Text on the Synthesis procedures of solid phases

20                  Text on the Quality control analysis and Mineral formula determination

21                  Text on the Sample preparation for different analytical techniques

22                  Text on the Results and Discussion of Na-, K-, and Pb-jarosites

23                  2 Tables

24                  2 Figures

25                  References

26

## 27 **Methods**

### 28 **2.1.1 Synthesis procedure of As-jarosites**

29 200 mL of ultra-pure water were heated to 95 °C in a 1 L covered flask at 1 atm.  
30 Subsequently,  $\text{Fe}_2(\text{SO}_4)_3 \cdot n\text{H}_2\text{O}$ , KOH, and varying amounts of  $\text{Na}_2\text{HAsO}_4 \cdot 7\text{H}_2\text{O}$  were  
31 added to the solution, in that order. Starting-solution compositions are summarized in Table  
32 S1; the relative As/S molar proportions in these solutions varied from 0.03 to 0.33 (0 for K-  
33 and Na-jarosites). The mixture was continuously stirred at a moderate speed (300 rpm) with  
34 a magnetic bar and held at 95 °C for 4 h. Afterwards the solution was allowed to settle at  
35 room temperature for an additional 20 h period, and the residual solution was decanted.

36

### 37 **2.1.2 Synthesis procedure of Pb-jarosite and Pb-As-jarosites**

38 Pb-jarosite was prepared by combining 1 L solution containing 0.054 M  $\text{Fe}_2(\text{SO}_4)_3 \cdot n\text{H}_2\text{O}$   
39 and 0.01 M  $\text{H}_2\text{SO}_4$  with 0.03 M  $\text{Pb}(\text{NO}_3)_2$ . Likewise, jarosites containing both As and Pb  
40 (Pb–As-jarosites) were synthesized with the addition of varying amounts of  
41  $\text{Na}_2\text{HAsO}_4 \cdot 7\text{H}_2\text{O}$ , 0.03 M  $\text{HNO}_3$  to maintain the required pH conditions, and 0.03 M  
42  $\text{Pb}(\text{NO}_3)_2$  to yield different As/Pb initial molar ratios (Table S1). In both cases (Pb- and  
43 Pb–As-jarosite), after reaching the appropriate temperature (95 °C), 200 mL of 0.03 M  
44  $\text{Pb}(\text{NO}_3)_2$  were added dropwise to the solution at a rate of 6 mL h<sup>-1</sup>, while stirring. Once all  
45 the  $\text{Pb}(\text{NO}_3)_2$  had been added, the precipitates were stirred for further 5 h, after which they  
46 were allowed to settle and the residual solutions decanted.

47

48 In all cases, the precipitates obtained were rinsed five times with 200 ml ultra-pure water  
49 (18 ΩM), oven-dried for 24 h at 105-110 °C, finely ground in an agate mortar, and stored  
50 for further analysis. All chemicals employed were of analytical grade and used as received  
51 without any additional purification.

52

### 53 **2.1.3 Synthesis procedure of amorphous ferric arsenate (AFA)**

54 A mixture of 0.02 M As(V) ( $\text{Na}_2\text{HAsO}_4 \cdot 7\text{H}_2\text{O}$ ) and 0.02 M Fe(III) [ $\text{Fe}_2(\text{SO}_4)_3 \cdot n\text{H}_2\text{O}$ ] was  
55 adjusted from an initial pH of 1.3 to pH 1.8 with NaOH solution and maintained at that pH  
56 for 2 h. The solid product was separated by centrifugation, filtration, washed four times  
57 with 1 L  $\text{H}_2\text{SO}_4$ -acidified Milli-Q water (pH 2), and oven-dried at 40 °C for 96 h.

## 58 **2.2 Characterization of synthetic jarosites**

### 59 **2.2.1 Chemical composition – quality control**

60 Dilutions of 1:9 (w/w) were performed to ensure that the concentration of the samples was  
61 within the range of the appropriate standards for analysis. For all elemental determinations,  
62 calibration curves were run before each sample series, including matrix-matched blanks and  
63 in-between calibration checks every 10 samples to test the accuracy of the results. The  
64 calibration solutions were prepared in the same matrix as the extracting reagents from  
65 certified stock solutions. Sample blanks were analyzed for correction of background effects  
66 on instrument response. Each reported value is the average of three analyses, <5% relative  
67 difference was recorded for each sample, and <2% relative difference for quality control  
68 standards. Separate analyses of duplicate samples differed by up to ~5% for each element.  
69 The detection limits showed that concentrations in the range of a few  $\mu\text{g L}^{-1}$  of each of the  
70 six elements could be analyzed.

71

### 72 **2.2.1 Chemical composition – mineral formula determination**

73 Synthetic jarosite-like minerals bring another complication into this already rather complex  
74 group of phases. They are usually characterized by a heterogeneous deficient *B*-site ( $\text{Fe}^{3+}$   
75 content)<sup>1-6</sup> as well as a deficient *A*-site occupied, besides the cationic atoms, by  $\text{H}_3\text{O}^+$  at  
76 different proportions. For those Na-, K-, and Pb-jarosite, the occupancy of either  $\text{Na}^+$ ,  $\text{K}^+$  or  
77  $\text{Pb}^{2+}$  in the *A*-site was fixed to the occupancy determined by ICP-OES and was constrained  
78 so that  $[\text{M}^{n+} + \text{H}_3\text{O}^+] = 100\%$  or 1 atom per formula unit (a.p.f.u.), where  $\text{M}^{n+}$  refers to  
79 either  $\text{Na}^+$ ,  $\text{K}^+$ , or  $\text{Pb}^{2+}$ . When the occupancy of the *A*-site was not restrained in these  
80 samples many of the formula determinations or refinements became unstable, with the  
81 occupancy of the *A*-site exceeding 100% and bond lengths becoming unreasonable.<sup>1</sup> For  
82 As- and Pb–As-jarosite series, we followed the same restriction of  $[\text{M}^{n+} + \text{H}_3\text{O}^+] = 1$  a.p.f.u.  
83 in the *A*-site but, here,  $\text{M}^{n+}$  refers to  $[\text{Na}^+ + \text{K}^+]$  and  $[\text{Na}^+ + \text{Pb}^{2+}]$  respectively, according to  
84 the composition of the starting synthesis solutions (Table 1). In addition, the *T* site in Na-,  
85 K-, and Pb-jarosite is assumed to be fully occupied by sulfur atoms ( $\text{S} = 2$  a.p.f.u.), whereas  
86 both As- and Pb–As-jarosite series were constrained on the basis of  $[\text{S} + \text{As}] = 2$  a.p.f.u. In  
87 order to simplify the formula determination of synthesized jarosites and for the sake of  
88 comparison between phases, we consider full occupancy of *A*-site in all cases by including

89 the amount of hydronium ( $\text{H}_3\text{O}^+$ ) needed to achieve the corresponding positive charge as a  
90 consequence of the incomplete incorporation of monovalent ( $\text{Na}^+$ ,  $\text{K}^+$ ) and/or divalent  
91 ( $\text{Pb}^{2+}$ ) cations into the structure.<sup>7,8</sup>

92

### 93 **2.2.2 XRD – sample preparation**

94 For diffraction analysis, samples were prepared following standard XRD procedures and  
95 mounted in aluminum holders. The samples were examined by XRD over a  $2\theta$  angle range  
96 of  $10\text{-}70^\circ$ , in step scan mode with preset time of 4s and step size of  $0.02^\circ$ . Mineral phase  
97 identification was made with a PDF-2 database using Shimadzu diffraction software.  
98 Crystallographic parameters of the bulk samples were calculated by Rietveld refinement of  
99 XRD spectra using TOPAS Academic v.4.1 software.<sup>9</sup> The specimen-dependent parameters  
100 refined were the zero error, displacement error, Chebyshev polynomial fitting for the  
101 background with six coefficients, cell parameters, crystallite size, atomic coordinates and  
102 isotropic temperature factors.

103

### 104 **2.2.3 ATR-FTIR spectroscopy analysis – sample preparation**

105 The diamond crystal was coated with the selected precipitate by applying a few mg of  
106 finely ground sample, evenly spread across the crystal surface, and hard-pressed with the  
107 help of a high-pressure clamp device which produced a stable deposit firmly adhered to the  
108 ATR crystal. Subsequently, a spectrum was taken as the average of 32 co-added scans at a  
109  $4\text{ cm}^{-1}$  resolution and ratioed against the bare crystal background. Spectra were co-added to  
110 improve the signal to noise ratio. The spectrometer was flushed continuously with nitrogen  
111 ( $\text{N}_2$ ) to reduce the amount of  $\text{CO}_2$  and humidity at low unvarying levels during analysis. All  
112 spectra were corrected before interpretation using the baseline correction tool. The peak  
113 position of the absorption bands was determined using Omnic v.9 software.

114

### 115 **2.2.3 SEM observation – sample preparation**

116 Samples were oven-dried overnight at  $50^\circ\text{C}$ , embedded in low-viscosity epoxy resin  
117 (EpoThin™ 2), and finely polished with a set of gradually thinner emery papers using a  
118 commercially available low viscosity oil/water emulsion as a lubricant. Samples were also  
119 mounted on standard aluminum pin stubs and thinly coated with gold or graphite for

120 morphological analysis. Microprobe analysis and microprobe profiles were made with an  
121 EDAX DX4i energy dispersive spectrometry (EDS) microanalytical system on the SEM  
122 with a resolution of 3.0 nm (30 kV). The following microscopy and analytical operating  
123 conditions were used: a tilt range of -10 to +90°, an accelerating voltage of 30 kV, a  
124 working distance of 10 mm, and a specimen current range of 1pA - 1µA.

125

## 126 **3 Results**

### 127 **3.1 Na-jarosite, K-jarosite and Pb-jarosite**

#### 128 *3.1.1 X-ray powder-diffraction*

129 Experimental procedures for the synthesis of either Na-, K-, or Pb-jarosite under acidic  
130 conditions led to the fast precipitation of a solid phase easily identified by X-ray diffraction  
131 as jarosite by comparison with the diffraction patterns International Center for Diffraction  
132 Data-Power Diffraction File (ICDD-PDF) No. 36-425, No. 22-827, and No. 39-1353  
133 corresponding to natrojarosite, potassium jarosite and plumbojarosite respectively (Fig.  
134 S1A). The absence of additional peaks indicates that no other crystalline or poorly-  
135 crystalline phases were present at detectable levels, except for the case of Pb-jarosite where  
136 conspicuous peaks at  $2\theta \approx 21^\circ$  and  $29^\circ$  were attributed to anglesite ( $\text{PbSO}_4$ ) (~5%). The  
137 presence of anglesite was also confirmed by SEM analysis (addressed later).

138

#### 139 *3.1.2 ATR-FTIR spectroscopy*

140 All precipitates were also analyzed by ATR-FTIR and the spectra collected for Na-, K-, and  
141 Pb-jarosite matched those patterns included in the Omnic software package for  
142 natrojarosite, potassium jarosite and plumbojarosite, respectively. Briefly, all spectra have  
143 one broad peak at 3000-3600  $\text{cm}^{-1}$  assigned to  $\nu(\text{O-H})$  modes of vibration originating from  
144 water, hydroxyl groups, and hydronium ions, appearing at lower wavenumbers for Pb-  
145 jarosite (3320  $\text{cm}^{-1}$ ) and Na-jarosite (3352  $\text{cm}^{-1}$ ) compared to K-jarosite (3378  $\text{cm}^{-1}$ ) (Fig.  
146 S1B). Other authors reported the  $\nu(\text{O-H})$  band for Pb-jarosite and Na-jarosite shifted from  
147 ours to ~3350 and ~3365  $\text{cm}^{-1}$ , respectively, due to differences in composition.<sup>10-12</sup> There  
148 are also three strong peaks in the region 1000-1200  $\text{cm}^{-1}$ : a doublet at two higher

149 wavenumbers ( $\sim 1100\text{-}1200\text{ cm}^{-1}$ ) due to the  $\nu_3(\text{SO}_4^{2-})$  vibration modes of sulfate species,  
150 and a singlet at  $\sim 1000\text{ cm}^{-1}$  assigned to the O-H deformation ( $\delta_{\text{OH}}$ ) coupled with  $\nu_1(\text{SO}_4^{2-})$   
151 vibration mode. The band near  $1100\text{ cm}^{-1}$  is cation sensitive and occurs at a higher  
152 frequency for Pb- ( $\sim 1110\text{ cm}^{-1}$ ) and Na-jarosite ( $\sim 1090\text{ cm}^{-1}$ ) than K-jarosite ( $\sim 1080\text{ cm}^{-1}$ )  
153 (Fig. S1B). In all cases, additional IR bands observed near  $470$  and  $500\text{ cm}^{-1}$  have been  
154 assigned to lattice vibrations of  $\text{FeO}_6$  coordination octahedra.<sup>10</sup>

155

### 156 *3.1.3 Scanning electron microscopy*

157 SEM observations of synthetic jarosites revealed differences in grain size and morphology  
158 depending on the cation involved. For instance, Na- and Pb-jarosite show intergrown  
159 rhombohedral (pseudocubic) crystals (Fig. S2b,c), which is characteristic of both sodium-  
160 and lead-containing jarosites,<sup>13</sup> with diameters ranging from  $1$  to  $5\text{ }\mu\text{m}$  in both cases. In  
161 addition, as detected by XRD, anglesite orthorhombic-type crystals with  $6\text{-}8\text{ }\mu\text{m}$  diameters  
162 are slightly scattered in the Pb-jarosite sample (Fig. S2c). In the case of K-jarosite, grain  
163 morphology ranges from subhedral to rounded and anhedral particles with  $1\text{-}2\text{ }\mu\text{m}$  of  
164 diameter, and sharp edges are not developed (Fig. S2a).

165

### 166 *3.1.4 Chemical composition*

167 As determined by ICP-OES, the atomic percentages of potassium and sodium (lead will be  
168 addressed later) were lower than the theoretical values for the formula  
169  $(\text{K,Na})\text{Fe}_3(\text{SO}_4)_2(\text{OH,H}_2\text{O})_6$ , indicating a possible substitution of part of the  $\text{K}^+\text{-Na}^+$  and  
170  $\text{OH}^-$  ions by  $\text{H}_3\text{O}^+$  and  $\text{H}_2\text{O}$  respectively (Table 1). The resulting Na-jarosite had  $\sim 70\%$  Na  
171 occupancy whereas K-jarosite had  $\sim 85\%$  K occupancy despite the fact that both ions were  
172 at the same concentration in the starting solutions ( $1\text{ M}$ ). In addition, both Na- and K-  
173 jarosite have also deficiency in Fe (B-sites) with values of  $2.74$  and  $2.79\text{ a.p.f.u.}$ ,  
174 respectively. In summary, the chemical composition of the jarosites synthesized in this  
175 study are in good agreement with those reported by Basciano and Peterson<sup>14</sup> for Na-jarosite  
176 (sample R) and by Drouet and Navrotsky<sup>7</sup> for K-jarosite (the one coprecipitated from KOH  
177 and iron (III) sulfate in their Table 1).

178 In the case of Pb-jarosite, the approximately 5% anglesite present in the sample determined  
179 by XRD semi-quantitative analysis has been taken into account to recalculate the amount of  
180 Pb incorporated into the jarosite structure from the results obtained by ICP-OES. Following  
181 the same procedure for Na- and K-jarosite chemical composition determination, the average  
182 formula of synthetic Pb-jarosite used in this work was found to be  
183  $(\text{H}_3\text{O})_{0.74}\text{Pb}_{0.13}\text{Fe}_{2.87}(\text{SO}_4)_2(\text{OH},\text{H}_2\text{O})_6$ , which differs noticeably from the ideal  
184 stoichiometric plumbojarosite end-member  $\text{Pb}_{0.5}\text{Fe}_3(\text{SO}_4)_2(\text{OH},\text{H}_2\text{O})_6$  despite highly similar  
185 XRD patterns.

186

## 187 **4. Discussion**

### 188 **4.1 Na-jarosite, K-jarosite and Pb-jarosite**

#### 189 *4.1.1 X-ray powder-diffraction*

190 The simultaneous appearance of anglesite along with Pb-jarosite is frequently observed in  
191 real scenarios, i.e. mine tailings, where plumbojarosite is the principal Pb-bearing phase.<sup>15</sup>  
192 Basciano and Peterson<sup>8</sup> observed an additional weak reflection at  $d = 11.25 \text{ \AA}$  (equivalent  
193 to  $\sim 8^\circ 2\theta$  in this work) owing to the doubled  $c$  axis as a result of divalent  $\text{Pb}^{2+}$  incorporation  
194 in the jarosite structure, thus resulting in two crystallographically different cation positions  
195 and coordination polyhedra, which are half filled with Pb cations. However, other studies  
196 did not report this reflection, even though such a distribution of Pb cations exhibits a  $c$  axis  
197 doubled in length on the unit cell, which has been observed for natural samples of  
198 plumbojarosite<sup>16</sup> ( $c = 33.675 \text{ \AA}$ ). In this work, and similarly to Bartlett and Nocera<sup>17</sup>, there  
199 is no diffraction feature at  $d \approx 11 \text{ \AA}$  ( $\sim 8^\circ 2\theta$ ) corresponding to a  $c$ -axis doubled  
200 superstructure. The first observed reflection in the powder diffraction pattern of Pb-jarosite  
201 (Fig. S1A, top) appears at  $\sim 15^\circ 2\theta$ , corresponding to a  $d_{003}$  typical for the interlayer  
202 distance of jarosites.<sup>14</sup>

203

#### 204 *4.1.2 ATR-FTIR spectroscopy*

205 All bands observed in the ATR-FTIR spectra (Fig. S1B) are similar to those reported  
206 previously<sup>7, 10, 11</sup> and can be assigned to vibrations of the jarosite-type structure. The

207 frequency shift between Na-, Pb- and K-jarosite in the 3000-3600  $\text{cm}^{-1}$  region can be  
208 attributed to an increase in energy of hydrogen bonds within the structure as a consequence  
209 of unit cell changes from the different ionic radii involved ( $r_{\text{K}^+} = 1.64 \text{ \AA}$ ,  $r_{\text{Na}^+} = 1.39 \text{ \AA}$ ,  $r_{\text{Pb}^{2+}}$   
210  $= 1.21 \text{ \AA}$ ),<sup>11, 18</sup> producing a decrease in the unit cell “c” parameter when smaller ions ( $\text{Pb}^{2+}$   
211 and  $\text{Na}^+$ ) are present.<sup>7</sup> The different band position near 1100  $\text{cm}^{-1}$  depends on the cation  
212 involved (Na, K, or Pb) and is in good agreement with Spratt *et al.*<sup>2</sup>, who found that these  
213 bands shifted to higher wavenumbers as the radius of the *A*-site cation decreased. Pb-  
214 jarosite shows broad and divided peaks in this region owing to the mixture of two types of  
215  $\text{SO}_4$ , one with  $\text{SO}_4$  adjacent to  $\text{Pb}^{2+}$  ions, and one where  $\text{SO}_4$  is not adjacent to  $\text{Pb}^{2+}$  ions  
216 (but to vacancies or  $\text{H}_3\text{O}^+$ ), with an extra peak at  $\sim 1070 \text{ cm}^{-1}$  not observed in either Na- or  
217 K-jarosite, and also attributed to  $\nu_3(\text{SO}_4^{2-})$ .

218

#### 219 4.1.3 Chemical composition

220 According to the values shown in Table 2, none of the precipitates obtained were end-  
221 member Na- or K-jarosite (Pb-jarosite will be discussed later) despite the addition of  $\text{Na}^+$  or  
222  $\text{K}^+$  in excess in the starting solutions to reduce the  $\text{H}_3\text{O}^+$  ions activity. This finding,  
223 however, is a predictable result since end-member jarosite synthesis difficulties have been  
224 previously reported by some authors.<sup>7, 19</sup> In this study, the incomplete incorporation of Na  
225 ( $\sim 70\%$ ) or K ( $\sim 85\%$ ) in the *A*-site suggests that  $\text{H}_3\text{O}^+$  ions compete more effectively with  
226  $\text{Na}^+$  than with  $\text{K}^+$  ions for occupancy of the *A*-sites. The similarity in solubility between  
227 natrojarosite and hydronium jarosites may also suggest an easier exchange between these  
228 ions vs. the exchange with  $\text{K}^+$ . Drouet and Navrotsky<sup>7</sup> reported that potassium is  
229 preferentially incorporated into the jarosite structure than sodium (and hydronium) because  
230 K-jarosite is more thermodynamically stable than the former,<sup>20</sup> according to end-member  
231 solubility product constants from PHREEQC,<sup>21</sup> which are  $10^{-5.28}$  for Na-jarosite,  $10^{-5.39}$  for  
232  $\text{H}_3\text{O}$ -jarosite, and  $10^{-9.21}$  for K-jarosite. For this reason, potassium-rich jarosite precipitates  
233 out of solution first, even when a very low amount of potassium is added to the solution.  
234 Our results from Visual MINTEQ and MINEQL+ geochemical modeling programs also  
235 predict the formation of jarosites with preferential incorporation of K over Na and  $\text{H}_3\text{O}$  in  
236 *A*-sites. Regarding the deficiency in Fe (*B*-sites), it has been reported that the Fe content in  
237 jarosites synthesized from dilute solutions at temperatures close to or below 100 °C (as



238 performed in this work) typically decreases from 3 a.p.f.u. to 2.20-2.57 a.p.f.u.<sup>3-5</sup> Therefore,  
239 the existence of apparent non-stoichiometry in synthetic jarosite due to deficiencies in both  
240 monovalent and trivalent cations is well established. But having less than full K<sup>+</sup> or Na<sup>+</sup> *A*-  
241 site occupancy does not necessarily involve H<sub>3</sub>O<sup>+</sup> structural incorporation,<sup>22</sup> and charge  
242 neutralization to make up for a deficiency in trivalent cation can occur by the addition of  
243 H<sup>+</sup>, resulting in frequently observed *A*-site vacancies.<sup>1, 14</sup> In this regard, Nielsen *et al.*<sup>6</sup>  
244 proposed that in jarosites containing Fe<sup>3+</sup> site vacancies, the presence of H<sup>+</sup> can react with  
245 the OH groups within the framework, then creating 4 Fe-OH<sub>2</sub> groups per Fe<sup>3+</sup> site vacancy  
246 and subsequent vacancy in the *A*-site would occur for only several of the *A*-sites. It is  
247 common to observe as much as 10-15% vacancy in the *B*-site of jarosite in synthetic  
248 studies, even up to 20%.<sup>23</sup> This suggests that the elusive H<sub>3</sub>O<sup>+</sup> ion plays a minor role in  
249 jarosite minerals than commonly assumed and, thus, it is not a key factor in formula  
250 determination.<sup>24</sup> The fact that H<sub>3</sub>O has been considered elusive could be explained by  
251 quantum mechanics as the hydronium cation is found to occupy a lower symmetry tilted  
252 orientation leading to a greater degree of disorder in the hydrogen positions. This higher  
253 level of disorder in the hydrogen positions offers a reasoning as to why their location has  
254 proved elusive thus far.<sup>25</sup> Therefore, as indicated in the Experimental Methods section and  
255 for the sake of comparison between phases of this work and others reported in the literature,  
256 we consider full occupancy of *A*-site in all cases by including the theoretical amount of  
257 hydronium (H<sub>3</sub>O<sup>+</sup>) needed to achieve the corresponding positive charge in the structure.  
258 In the case of Pb-jarosite (Table 2), such a level of hydronium-for-lead substitution and Fe  
259 deficiency was also reported in synthetic<sup>8, 13</sup> and natural<sup>4</sup> samples. The apparent difficulty  
260 to prepare a pure end-member plumbojarosite sample by synthesis at moderate temperature  
261 and pressure conditions, generally involving aqueous solutions at very low pH, might find  
262 crystallographic explanation due to structural changes (doubling of the *c*-axis parameter) as  
263 the lead content increases. According to Basciano and Peterson<sup>8</sup>, less than a third of the *A*-  
264 site of the jarosite structure needs to be filled by Pb<sup>2+</sup> in order to attain the doubling of the  
265 *c*-axis parameter mentioned above to ~33.7 Å. At this lead concentration, the H<sub>3</sub>O<sup>+</sup> content  
266 reaches 0.34 per unit formula. Thus, the stretching effect along the *c*-axis might create a  
267 miscibility gap in the solid solution between plumbojarosite and hydronium jarosite.<sup>13</sup>

268 Therefore, there is limited  $\text{Pb}^{2+}$  incorporation in the jarosite structure and charge balance is  
269 maintained by incorporating  $\text{H}_3\text{O}^+$  since no other cations are present.

270

272 **Table S1.** Starting-solution compositions and solid molar relationships of synthesized precipitates

| Sample                                | Molar concentrations |      |                 |       |                |                 |                                    | Aqueous molar ratios <sup>a</sup> |       | Solid molar ratios     |         |          |
|---------------------------------------|----------------------|------|-----------------|-------|----------------|-----------------|------------------------------------|-----------------------------------|-------|------------------------|---------|----------|
|                                       | Na                   | K    | Pb <sup>c</sup> | Fe    | S <sup>d</sup> | As <sup>e</sup> | OH <sup>-</sup>                    | As/S                              | As/Pb | As/(As+S) <sup>f</sup> | As/Pb   | Fe/As    |
| <i>a) Pure jarosites</i>              |                      |      |                 |       |                |                 |                                    |                                   |       |                        |         |          |
| Na-jarosite                           | 1.00                 | na   | na              | 1.08  | 1.62           | na              | 1.00                               | na                                | na    | n.a.                   | n.a.    |          |
| K-jarosite                            | na                   | 1.00 | na              | 1.08  | 1.62           | na              | 1.00                               | na                                | na    | n.a.                   | n.a.    |          |
| Pb-jarosite                           | na                   | na   | 0.03            | 0.11  | 0.17           | na              | 0.02(H <sup>+</sup> ) <sup>‡</sup> | na                                | na    | n.a.                   | n.a.    |          |
| <i>b) As-jarosites<sup>b</sup></i>    |                      |      |                 |       |                |                 |                                    |                                   |       |                        |         |          |
| As-jarosite 3%                        | 0.11                 | 1.00 | na              | 1.08  | 1.62           | 0.054           | 1.00                               | 0.03                              | na    | 0.0223(7)              | n.a.    | 36(1)    |
| As-jarosite 6%                        | 0.22                 | 1.00 | na              | 1.08  | 1.62           | 0.108           | 1.00                               | 0.06                              | na    | 0.0459(1)              | n.a.    | 19.2(4)  |
| As-jarosite 12%                       | 0.43                 | 1.00 | na              | 1.08  | 1.62           | 0.216           | 1.00                               | 0.13                              | na    | 0.105(1)               | n.a.    | 9.1(1)   |
| As-jarosite 17%                       | 0.65                 | 1.00 | na              | 1.08  | 1.62           | 0.324           | 1.00                               | 0.20                              | na    | 0.21(2)                | n.a.    | 5.2(1)   |
| As-jarosite 25%                       | 1.08                 | 1.00 | na              | 1.08  | 1.62           | 0.540           | 1.00                               | 0.33                              | na    | 0.417(1) <sup>‡</sup>  | n.a.    | 3.06(5)  |
| <i>c) Pb-As-jarosites<sup>b</sup></i> |                      |      |                 |       |                |                 |                                    |                                   |       |                        |         |          |
| Pb-As-jarosite 3%                     | 0.011                | na   | 0.03            | 0.108 | 0.162          | 0.0054          | 0.03                               | 0.03                              | 0.18  | 0.044(1)               | 0.77(5) | 18.8(4)  |
| Pb-As-jarosite 6%                     | 0.022                | na   | 0.03            | 0.108 | 0.162          | 0.0108          | 0.03                               | 0.06                              | 0.36  | 0.076(2)               | 1.5(2)  | 11.18(5) |
| Pb-As-jarosite 12%                    | 0.043                | na   | 0.03            | 0.108 | 0.162          | 0.0216          | 0.03                               | 0.13                              | 0.72  | 0.136(3)               | 2.3(1)  | 5.90(9)  |
| Pb-As-jarosite 17%                    | 0.065                | na   | 0.03            | 0.108 | 0.162          | 0.0324          | 0.03                               | 0.20                              | 1.08  | 0.275(7)               | 4.1(3)  | 3.90(3)  |
| Pb-As-jarosite 21%                    | 0.086                | na   | 0.03            | 0.108 | 0.162          | 0.0432          | 0.03                               | 0.27                              | 1.44  | 0.33(2)                | 3.6(3)  | 3.5(3)   |
| Pb-As-jarosite 25%                    | 0.108                | na   | 0.03            | 0.108 | 0.162          | 0.0540          | 0.03                               | 0.33                              | 1.80  | 0.387(1) <sup>‡</sup>  | 4.6(1)  | 3.30(3)  |

273 <sup>a</sup> Initial aqueous molar ratios.274 <sup>b</sup> Numbers are increasing AsO<sub>4</sub> concentration in the starting solution based on X% = [AsO<sub>4(aq)</sub>]/([AsO<sub>4(aq)</sub>]+[SO<sub>4(aq)</sub>]).275 <sup>c</sup> Added as Pb(NO<sub>3</sub>)<sub>2</sub>.276 <sup>d</sup> Added as Fe<sub>2</sub>(SO<sub>4</sub>)<sub>3</sub>·nH<sub>2</sub>O.277 <sup>e</sup> Added as Na<sub>2</sub>HAsO<sub>4</sub>·7H<sub>2</sub>O.278 <sup>f</sup> Arsenate molar fraction within the jarosite structure. Computed as [AsO<sub>4</sub>]/(AsO<sub>4</sub>+SO<sub>4</sub>).279 <sup>‡</sup> Addition of H<sup>+</sup> instead of OH<sup>-</sup>.280 <sup>‡</sup> Computed from the bulk precipitate since no jarosite was formed.

281 n.a., not applicable.

282

283  
284  
285  
286  
287  
288  
289  
290  
291  
292  
293  
294  
295  
296  
297  
298  
299  
300  
301

**Table S2.** Comparison of the differences in unit-cell parameters of Pb–As-jarositest arising from the incorporation of arsenic and lead

| Sample <sup>a</sup>                | As/Pb = 0.18      | As/Pb = 0.36 <sup>b</sup> |                  | As/Pb = 0.72 <sup>b</sup> |                  | As/Pb = 1.08     | As/Pb = 1.44     |
|------------------------------------|-------------------|---------------------------|------------------|---------------------------|------------------|------------------|------------------|
|                                    |                   | Phase I (70%)             | Phase II (30%)   | Phase I (55%)             | Phase II (45%)   |                  |                  |
| <b>CELL PARAMETERS<sup>c</sup></b> |                   |                           |                  |                           |                  |                  |                  |
| <i>a</i> (Å)                       | 7.3270(4)         | 7.3357(3)                 | 7.3385(4)        | 7.3330(4)                 | 7.3342(6)        | 7.3359(4)        | 7.3378(6)        |
| <i>c</i> (Å)                       | 16.8443(9)        | 16.8120(7)                | 16.8854(8)       | 16.7689(9)                | 16.876(1)        | 16.869(1)        | 16.882(1)        |
| Cell volume (Å <sup>3</sup> )      | <b>783.141(9)</b> | <b>783.481(7)</b>         | <b>787.52(9)</b> | <b>780.919(9)</b>         | <b>786.17(1)</b> | <b>786.26(1)</b> | <b>787.19(1)</b> |
| <b>CRITERIA OF FIT<sup>d</sup></b> |                   |                           |                  |                           |                  |                  |                  |
| <i>R</i> <sub>wp</sub>             | 10.67             | 9.13                      |                  | 9.11                      |                  | 8.72             | 9.35             |
| <i>R</i> <sub>p</sub>              | 3.63              | 3.53                      |                  | 2.90                      |                  | 4.87             | 2.68             |
| Gof                                | 1.84              | 1.62                      |                  | 1.45                      |                  | 1.71             | 1.80             |

<sup>a</sup> Precipitates obtained from the corresponding As/Pb initial conditions.

<sup>b</sup> Sample was fit with two jarosite phases (see text).

<sup>c</sup> Estimated standard deviations in parenthesis.

<sup>d</sup> *R*<sub>wp</sub> = weighted-pattern, *R*<sub>p</sub> = R-pattern, Gof = Goodness of fit.

302

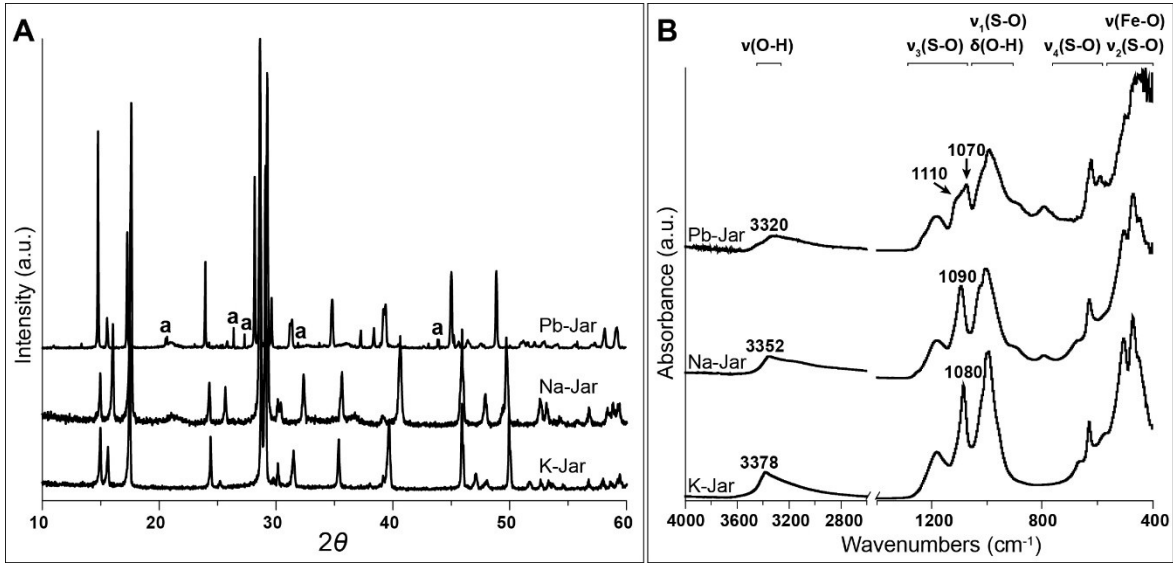

303

304 **Figure S1.** X-ray powder-diffraction patterns (A) and ATR-FTIR spectra (B) of synthetic K-jarosite  
305 (bottom), Na-jarosite (mid), and Pb-jarosite (top). Anglesite, occurring as a minor phase in the Pb-  
306 jarosite sample, is indicated by “a”.

307

308

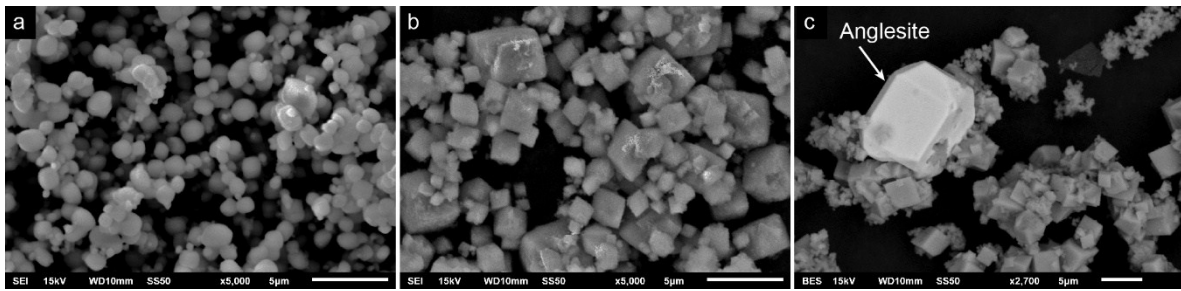

310

311 **Figure S2.** Scanning electron microprobe (SEM) images of synthetic (a) K-jarosite, (b) Na-jarosite,  
312 and (c) Pb-jarosite, showing morphological differences related to the main A-site cation. Anglesite,  
313 occurring as a minor phase in the Pb-jarosite sample, is indicated by an arrow.

314

315 **References**

- 316 1. L. C. Basciano and R. C. Peterson, Jarosite-hydronium jarosite solid-solution series with  
317 full iron site occupancy: Mineralogy and crystal chemistry, *Am Mineral*, 2007, **92**, 1464-  
318 1473
- 319 2. H. J. Spratt, L. Rintoul, M. Avdeev and W. N. Martens, The crystal structure and  
320 vibrational spectroscopy of jarosite and alunite minerals, *Am Mineral*, 2013, **98**, 1633-  
321 1643
- 322 3. C. Hartig, P. Brand and K. Bohmhammel, Fe-Al-isomorphism and structural water in  
323 crystals of jarosite-alunite-type, *Z Anorg Allg Chem*, 1984, **508**, 159-164
- 324 4. J. A. Ripmeester, C. I. Ratcliffe, J. E. Dutrizac and J. L. Jambor, Hydronium ion in the  
325 alunite-jarosite group, *Can Mineral*, 1986, **24**, 435-437
- 326 5. I. E. Grey, N. V. Y. Scarlett and H. E. A. Brand, Crystal chemistry and formation  
327 mechanism of non-stoichiometric monoclinic K-jarosites, *Mineral Mag*, 2013, **77**, 249-  
328 268
- 329 6. U. G. Nielsen, I. Heinmaa, A. Samoson, J. Majzlan and C. P. Grey, Insight into the local  
330 magnetic environments and deuteron mobility in jarosite ( $AFe_3(SO_4)_2(OD,OD_2)_6$ ,  
331  $A = K, Na, D_3O$ ) and hydronium alunite ( $(D_3O)Al_3(SO_4)_2(OD)_6$ ), from variable-  
332 temperature  $^2H$  MAS NMR spectroscopy, *Chem Mater*, 2011, **23**, 3176-3187
- 333 7. C. Drouet and A. Navrotsky, Synthesis, characterization, and thermochemistry of K-Na-  
334  $H_3O$  jarosites, *Geochim Cosmochim Acta*, 2003, **67**, 2063-2076
- 335 8. L. C. Basciano and R. C. Peterson, A crystallographic study of the incomplete solid-  
336 solution between plumbojarosite and jarosite, *Can Mineral*, 2010, **48**, 651-659
- 337 9. R. W. Cheary and A. Coelho, Fundamental parameters approach to x-ray line-profile  
338 fitting, *J Appl Crystallogr*, 1992, **25**, 109-121
- 339 10. K. Sasaki, O. Tanaike and H. Konno, Distinction of jarosite-group compounds by  
340 Raman spectroscopy, *Can Mineral*, 1998, **36**, 1225-1235
- 341 11. J. L. Bishop and E. Murad, The visible and infrared spectral properties of jarosite and  
342 alunite, *Am Mineral*, 2005, **90**, 1100-1107
- 343 12. R. L. Frost, R. A. Wills, M. L. Weier and W. Martens, Comparison of the Raman  
344 spectra of natural and synthetic K- and Na-jarosites at 298 and 77 K, *J Raman Spectrosc*,  
345 2005, **36**, 435-444
- 346 13. F. L. Forray, A. M. L. Smith, C. Drouet, A. Navrotsky, K. Wright, K. A. Hudson-  
347 Edwards and W. E. Dubbin, Synthesis, characterization and thermochemistry of a Pb-  
348 jarosite, *Geochim Cosmochim Acta*, 2010, **74**, 215-224

- 349 14. L. C. Basciano and R. C. Peterson, Crystal chemistry of the natrojarosite-jarosite and  
350 natrojarosite-hydronium jarosite solid-solution series: A synthetic study with full Fe site  
351 occupancy, *Am Mineral*, 2008, **93**, 853-862
- 352 15. S. M. Hayes, S. M. Webb, J. R. Bargar, P. A. O'Day, R. M. Maier and J. Chorover,  
353 Geochemical weathering increases lead bioaccessibility in semi-arid mine tailings,  
354 *Environ Sci Technol*, 2012, **46**, 5834-5841
- 355 16. J. T. Szymanski, The crystal structure of plumbojarosite  $Pb[Fe_3(SO_4)_2(OH)_6]_2$ , *Can*  
356 *Mineral*, 1985, **23**, 659-668
- 357 17. B. M. Bartlett and D. G. Nocera, Long-range magnetic ordering in iron jarosites  
358 prepared by redox-based hydrothermal methods, *J Am Chem Soc*, 2005, **127**, 8985-8993
- 359 18. J. E. Dutrizac and J. L. Jambor, Jarosites and their application in hydrometallurgy, *Rev*  
360 *Mineral Geochem*, 2000, **40**, 404-452
- 361 19. G. A. Desborough, K. S. Smith, H. A. Lowers, G. A. Swayze, J. M. Hammarstrom, S.  
362 F. Diehl, R. L. Driscoll and R. W. Leinz, editors. The use of synthetic jarosite as an  
363 analog for natural jarosite. Int Conf Acid Rock Drain, 7th; 2006; St. Louis, Missouri.
- 364 20. S. Gaboreau and P. Vieillard, Prediction of Gibbs free energies of formation of minerals  
365 of the alunite supergroup 1, *Geochim Cosmochim Acta*, 2004, **68**, 3307-3316
- 366 21. C. A. J. Appelo, D. L. Parkhurst and V. E. A. Post, Equations for calculating  
367 hydrogeochemical reactions of minerals and gases such as CO<sub>2</sub> at high pressures and  
368 temperatures, *Geochim Cosmochim Acta*, 2014, **125**, 49-67
- 369 22. J. Majzlan, J. Plášil, R. Škoda, J. Gescher, F. Kögler, A. Rusznyak, K. Küsel, T. R.  
370 Neu, S. Mangold and J. Rothe, Arsenic-rich acid mine water with extreme arsenic  
371 concentration: Mineralogy, geochemistry, microbiology, and environmental  
372 implications, *Environ Sci Technol*, 2014, **48**, 13685-13693
- 373 23. C. Drouet, K. L. Pass, D. Baron, S. Draucker and A. Navrotsky, Thermochemistry of  
374 jarosite-alunite and natrojarosite-natroalunite solid solutions, *Geochim Cosmochim Acta*,  
375 2004, **68**, 2197-2205
- 376 24. J. Majzlan, R. Stevens, J. Boerio-Goates, B. F. Woodfield, A. Navrotsky, P. C. Burns,  
377 M. K. Crawford and T. G. Amos, Thermodynamic properties, low-temperature heat-  
378 capacity anomalies, and single-crystal X-ray refinement of hydronium jarosite,  
379  $(H_3O)Fe_3(SO_4)_2(OH)_6$ , *Physics and Chemistry of Minerals*, 2004, **31**, 518-531
- 380 25. J. D. Gale, K. Wright and K. A. Hudson-Edwards, A first-principles determination of  
381 the orientation of H<sub>3</sub>O<sup>+</sup> in hydronium alunite, 2010, **95**, 1109-1112
- 382
